# Supplementary material for: Evaluation of the Structural Validity of the Work Instability Scale Using the Rasch Model
Source: PubMed Central journal article supplement (PMC7984990; doi:10.1016/j.arrct.2021.100103), 2021-01-13
Supplement: mmc1.pdf [file mmc1.pdf]

Supplementary Table. The residual correlation between items in 20-item Work Instability Scale

| Item | I02   | I03   | I04   | I05   | I06   | I07   | I08   | I09   | I10   | I11   | I12   | I13   | I14   | I15   | I16   | I17   | I18   | I20   | I21   | I22  |
|------|-------|-------|-------|-------|-------|-------|-------|-------|-------|-------|-------|-------|-------|-------|-------|-------|-------|-------|-------|------|
| I02  | 1     |       |       |       |       |       |       |       |       |       |       |       |       |       |       |       |       |       |       |      |
| I03  | 0.14  | 1.00  |       |       |       |       |       |       |       |       |       |       |       |       |       |       |       |       |       |      |
| I04  | 0.04  | -0.07 | 1.00  |       |       |       |       |       |       |       |       |       |       |       |       |       |       |       |       |      |
| I05  | -0.04 | -0.09 | -0.05 | 1.00  |       |       |       |       |       |       |       |       |       |       |       |       |       |       |       |      |
| I06  | -0.01 | -0.08 | 0.00  | 0.00  | 1.00  |       |       |       |       |       |       |       |       |       |       |       |       |       |       |      |
| I07  | -0.01 | -0.10 | 0.05  | 0.05  | 0.07  | 1.00  |       |       |       |       |       |       |       |       |       |       |       |       |       |      |
| I08  | 0.03  | -0.01 | 0.00  | -0.14 | -0.01 | 0.05  | 1.00  |       |       |       |       |       |       |       |       |       |       |       |       |      |
| I09  | -0.06 | -0.15 | -0.07 | -0.11 | -0.04 | -0.20 | -0.11 | 1.00  |       |       |       |       |       |       |       |       |       |       |       |      |
| I10  | -0.13 | -0.13 | -0.01 | -0.09 | -0.28 | -0.04 | -0.13 | 0.14  | 1.00  |       |       |       |       |       |       |       |       |       |       |      |
| I11  | -0.11 | -0.13 | -0.04 | -0.19 | 0.02  | -0.08 | -0.14 | -0.02 | -0.06 | 1.00  |       |       |       |       |       |       |       |       |       |      |
| I12  | 0.03  | -0.08 | 0.00  | 0.00  | -0.04 | -0.02 | -0.08 | 0.03  | 0.00  | -0.02 | 1.00  |       |       |       |       |       |       |       |       |      |
| I13  | -0.10 | -0.01 | -0.01 | -0.15 | -0.17 | -0.08 | -0.15 | 0.27  | 0.15  | 0.08  | 0.01  | 1.00  |       |       |       |       |       |       |       |      |
| I14  | 0.11  | 0.26  | -0.06 | -0.04 | -0.11 | -0.15 | -0.03 | -0.09 | -0.09 | -0.14 | -0.05 | -0.10 | 1.00  |       |       |       |       |       |       |      |
| I15  | -0.05 | -0.04 | 0.09  | -0.07 | -0.10 | 0.11  | 0.05  | -0.10 | 0.02  | -0.02 | -0.06 | 0.02  | -0.10 | 1.00  |       |       |       |       |       |      |
| I16  | -0.08 | -0.11 | -0.03 | -0.01 | -0.04 | -0.03 | 0.04  | -0.08 | -0.03 | -0.07 | -0.11 | -0.15 | -0.07 | -0.07 | 1.00  |       |       |       |       |      |
| I17  | -0.09 | 0.06  | -0.23 | -0.08 | 0.00  | -0.11 | -0.03 | -0.07 | -0.16 | -0.09 | -0.15 | -0.03 | 0.08  | -0.20 | -0.04 | 1.00  |       |       |       |      |
| I18  | -0.11 | -0.17 | 0.03  | -0.06 | 0.01  | -0.05 | -0.06 | 0.01  | 0.09  | -0.02 | -0.05 | -0.05 | -0.10 | -0.10 | -0.05 | -0.05 | 1.00  |       |       |      |
| I20  | -0.10 | -0.01 | -0.05 | 0.00  | -0.03 | -0.05 | -0.07 | -0.09 | 0.06  | -0.14 | -0.12 | 0.04  | -0.07 | 0.03  | 0.02  | 0.00  | -0.02 | 1.00  |       |      |
| I21  | 0.01  | -0.11 | -0.15 | -0.05 | -0.10 | -0.06 | -0.07 | -0.01 | 0.03  | -0.01 | -0.08 | -0.09 | -0.10 | -0.09 | 0.05  | 0.06  | -0.11 | -0.03 | 1.00  |      |
| I22  | -0.14 | 0.01  | -0.02 | -0.06 | -0.08 | -0.19 | -0.05 | -0.09 | -0.11 | 0.10  | -0.10 | -0.13 | -0.01 | -0.03 | -0.14 | -0.01 | -0.12 | -0.12 | -0.09 | 1.00 |

Residual correlations between any two items greater than 0.2 above the average residual correlation was taken as an indicator of local dependency
